# Supplementary material for: An epigenetic screening determines BET proteins as targets to suppress self-renewal and tumorigenicity in canine mammary cancer cells
Source: Sci Rep. 2019 Nov 22;9:17363. doi: 10.1038/s41598-019-53915-7 (PMC6874531; doi:10.1038/s41598-019-53915-7)
Supplement: Supplementary file 2 — Supplementary Table S2 [file 41598_2019_53915_MOESM2_ESM.xlsx]

## Sheet: Planilha1
	Supplementary Table S2. Full list of 960 differentialy expressed genes in (+)-JQ1-treated tumorspheres in comparison with (-)-JQ1-treated tumorspheres
	Gene Ensembl ID	logFC	logCPM	Pvalue	FDR
	ENSCAFG00000007251	-7.18094	2.0011	2.81787e-80	1.80888e-78
	ENSCAFG00000015625	-6.43965	4.49008	0	0
	ENSCAFG00000000874	-6.01391	2.45359	3.63157e-96	3.45862e-94
	ENSCAFG00000018405	-5.97583	4.42706	0	0
	ENSCAFG00000040526	-5.89568	1.05391	1.97363e-62	7.90743e-61
	ENSCAFG00000008359	-5.49256	3.0217	1.41693e-156	3.50283e-154
	ENSCAFG00000031666	-5.42888	1.22393	5.41102e-58	1.91679e-56
	ENSCAFG00000006142	-5.30285	7.78159	0	0
	ENSCAFG00000024288	-5.30271	2.44139	9.09779e-110	1.14899e-107
	ENSCAFG00000033166	-5.19974	0.399263	2.20729e-34	3.6378e-33
	ENSCAFG00000005068	-5.03438	-0.36599	3.58572e-22	3.33535e-21
	ENSCAFG00000003684	-5.00647	2.60091	3.24682e-108	3.97104e-106
	ENSCAFG00000006674	-5.00228	-0.0567215	1.69482e-23	1.67878e-22
	ENSCAFG00000017871	-4.38066	0.90984	1.95569e-40	4.05047e-39
	ENSCAFG00000009666	-4.38066	0.679429	3.2253e-41	6.79698e-40
	ENSCAFG00000005012	-4.37873	0.786884	3.02185e-40	6.23639e-39
	ENSCAFG00000001394	-4.3173	-0.388601	6.6289e-21	5.70105e-20
	ENSCAFG00000008335	-4.30459	0.0147101	9.32398e-26	1.04976e-24
	ENSCAFG00000031918	-4.22364	1.60607	1.77536e-41	3.76422e-40
	ENSCAFG00000015553	-4.12057	0.857348	3.22913e-41	6.79698e-40
	ENSCAFG00000000923	-4.07793	1.71615	4.72513e-54	1.50003e-52
	ENSCAFG00000032756	-3.96235	3.41371	5.62651e-130	1.02148e-127
	ENSCAFG00000017137	-3.95499	1.80364	1.54977e-52	4.58188e-51
	ENSCAFG00000006138	-3.9287	6.9033	0	0
	ENSCAFG00000015708	-3.92811	-0.14371	2.495e-22	2.33221e-21
	ENSCAFG00000015033	-3.87676	-0.182862	7.95257e-22	7.20756e-21
	ENSCAFG00000019974	-3.84616	0.0675467	1.24267e-19	9.98519e-19
	ENSCAFG00000029022	-3.80372	0.661973	7.93683e-31	1.1329e-29
	ENSCAFG00000024540	-3.71345	4.72108	1.32416e-206	5.30531e-204
	ENSCAFG00000030403	-3.71274	2.0975	1.19431e-69	5.71058e-68
	ENSCAFG00000033364	-3.71142	2.00823	1.93012e-79	1.2057e-77
	ENSCAFG00000009912	-3.71042	0.57675	5.9035e-30	8.07924e-29
	ENSCAFG00000018806	-3.63632	3.53695	1.66464e-174	5.68866e-172
	ENSCAFG00000028862	-3.62091	4.18212	3.31234e-222	1.67331e-219
	ENSCAFG00000007247	-3.6052	3.45743	7.54393e-66	3.28288e-64
	ENSCAFG00000019214	-3.58202	-0.287216	4.30733e-18	3.15952e-17
	ENSCAFG00000005150	-3.56538	-0.298677	2.46285e-18	1.83671e-17
	ENSCAFG00000016907	-3.53392	1.61248	3.98524e-51	1.11042e-49
	ENSCAFG00000023529	-3.5329	0.920917	3.95073e-24	4.04437e-23
	ENSCAFG00000015493	-3.51181	2.46704	8.06043e-93	7.20416e-91
	ENSCAFG00000033758	-3.496	0.211501	3.87827e-24	3.9772e-23
	ENSCAFG00000017184	-3.47735	0.100649	2.42832e-22	2.27354e-21
	ENSCAFG00000029322	-3.44883	1.73066	2.31023e-35	3.92435e-34
	ENSCAFG00000006402	-3.43229	0.250135	1.5723e-21	1.39775e-20
	ENSCAFG00000039188	-3.42838	0.628197	1.23408e-30	1.7465e-29
	ENSCAFG00000003488	-3.40018	2.24541	3.29107e-64	1.34644e-62
	ENSCAFG00000006240	-3.38611	0.781154	7.94696e-34	1.26835e-32
	ENSCAFG00000031250	-3.37793	2.26934	1.19875e-32	1.83993e-31
	ENSCAFG00000018600	-3.36754	3.10569	1.1845e-126	1.9946e-124
	ENSCAFG00000036285	-3.33478	0.54504	1.46465e-20	1.23946e-19
	ENSCAFG00000036356	-3.3029	1.47416	6.41935e-38	1.22474e-36
	ENSCAFG00000017634	-3.30174	0.706608	6.68496e-31	9.60106e-30
	ENSCAFG00000014957	-3.2554	0.264442	3.02084e-23	2.95696e-22
	ENSCAFG00000007470	-3.21069	-0.12372	8.87288e-18	6.35206e-17
	ENSCAFG00000014448	-3.14911	2.18296	1.50533e-68	6.99615e-67
	ENSCAFG00000016159	-3.13982	0.371114	1.75727e-20	1.48061e-19
	ENSCAFG00000019336	-3.12706	1.37558	4.33013e-32	6.48348e-31
	ENSCAFG00000005337	-3.09467	4.56392	1.94445e-267	1.41203e-264
	ENSCAFG00000029756	-3.09074	3.40823	1.20025e-87	9.29716e-86
	ENSCAFG00000013819	-3.07116	2.18546	1.60199e-54	5.15611e-53
	ENSCAFG00000000693	-3.04985	-0.15323	1.1769e-14	6.94134e-14
	ENSCAFG00000037620	-3.04506	1.10568	4.57685e-26	5.21869e-25
	ENSCAFG00000024189	-2.97446	2.19898	1.04383e-34	1.73757e-33
	ENSCAFG00000018996	-2.96291	-0.233939	9.7635e-16	6.19902e-15
	ENSCAFG00000011940	-2.96067	1.21099	1.15225e-33	1.82896e-32
	ENSCAFG00000015143	-2.95067	0.0912591	3.76755e-16	2.46482e-15
	ENSCAFG00000008705	-2.93296	-0.0861002	7.13748e-16	4.57926e-15
	ENSCAFG00000018641	-2.9266	0.920449	1.44825e-17	1.02293e-16
	ENSCAFG00000011953	-2.9243	1.21141	2.60549e-37	4.80527e-36
	ENSCAFG00000040753	-2.89261	-0.113832	4.09523e-15	2.49908e-14
	ENSCAFG00000004568	-2.89249	7.34693	0	0
	ENSCAFG00000020353	-2.86527	1.09589	1.94093e-30	2.7008e-29
	ENSCAFG00000001113	-2.85067	2.14874	9.18126e-54	2.85233e-52
	ENSCAFG00000014812	-2.83357	8.17976	0	0
	ENSCAFG00000015429	-2.82124	-0.354519	5.30404e-14	3.00183e-13
	ENSCAFG00000037314	-2.78923	1.12889	1.31007e-30	1.84505e-29
	ENSCAFG00000012156	-2.77881	2.53992	2.34069e-76	1.32022e-74
	ENSCAFG00000032161	-2.76665	0.668436	2.3524e-15	1.45231e-14
	ENSCAFG00000004930	-2.76137	0.825451	4.19754e-18	3.08483e-17
	ENSCAFG00000037696	-2.74531	-0.0209497	3.91353e-14	2.23008e-13
	ENSCAFG00000016155	-2.72819	2.38588	5.82938e-56	1.92968e-54
	ENSCAFG00000020317	-2.72399	0.35095	3.88075e-15	2.37318e-14
	ENSCAFG00000029887	-2.71776	-0.113945	1.54458e-14	9.04561e-14
	ENSCAFG00000007149	-2.6949	0.140743	1.40078e-16	9.39702e-16
	ENSCAFG00000034912	-2.6899	0.674718	1.2541e-19	1.00631e-18
	ENSCAFG00000001460	-2.68032	5.12219	9.52527e-174	3.16212e-171
	ENSCAFG00000015936	-2.67425	1.21676	6.37689e-25	6.84147e-24
	ENSCAFG00000007893	-2.67309	1.15331	1.23475e-31	1.81832e-30
	ENSCAFG00000002645	-2.6662	3.5407	3.4134e-121	5.15069e-119
	ENSCAFG00000005330	-2.65841	2.42459	2.68102e-56	9.0031e-55
	ENSCAFG00000003438	-2.64821	-0.233893	4.37777e-13	2.32368e-12
	ENSCAFG00000013162	-2.64057	3.51596	9.78589e-83	6.76799e-81
	ENSCAFG00000011769	-2.63467	2.55444	1.1677e-30	1.65458e-29
	ENSCAFG00000004687	-2.59328	0.60452	3.952e-17	2.72998e-16
	ENSCAFG00000009445	-2.58096	1.39845	1.26878e-30	1.78907e-29
	ENSCAFG00000008704	-2.57632	8.93382	0	0
	ENSCAFG00000018339	-2.51852	3.42638	4.57378e-85	3.28042e-83
	ENSCAFG00000010928	-2.49171	1.84979	6.13191e-39	1.21168e-37
	ENSCAFG00000024916	-2.4889	4.99776	2.62945e-165	7.6379e-163
	ENSCAFG00000007004	-2.48224	0.384959	4.61315e-16	3.00281e-15
	ENSCAFG00000011069	-2.47317	0.321613	1.58448e-15	9.9299e-15
	ENSCAFG00000010438	-2.46503	4.32658	2.67889e-111	3.45844e-109
	ENSCAFG00000024908	-2.44949	1.76057	5.1366e-34	8.28919e-33
	ENSCAFG00000023742	-2.41121	3.48028	3.38542e-68	1.56714e-66
	ENSCAFG00000012318	-2.40455	0.706291	8.90881e-20	7.22341e-19
	ENSCAFG00000006200	-2.39378	2.36675	1.97928e-45	4.77121e-44
	ENSCAFG00000020342	-2.38807	1.08302	3.11357e-18	2.30571e-17
	ENSCAFG00000006445	-2.37552	-0.0123701	1.78174e-09	7.0849e-09
	ENSCAFG00000008902	-2.37402	3.4367	2.23676e-97	2.18394e-95
	ENSCAFG00000004901	-2.36232	0.600143	6.27326e-16	4.04265e-15
	ENSCAFG00000018952	-2.36107	-0.133193	3.21224e-11	1.48875e-10
	ENSCAFG00000000446	-2.35487	2.81893	5.42858e-69	2.56401e-67
	ENSCAFG00000007683	-2.34804	0.669099	3.73553e-16	2.44525e-15
	ENSCAFG00000004277	-2.30084	0.98826	2.23306e-23	2.19695e-22
	ENSCAFG00000014220	-2.28235	3.14991	2.88292e-79	1.77231e-77
	ENSCAFG00000000097	-2.2805	0.947326	1.45143e-15	9.11085e-15
	ENSCAFG00000015363	-2.27374	2.43271	8.72207e-22	7.86814e-21
	ENSCAFG00000001450	-2.26836	4.77112	3.98761e-105	4.68001e-103
	ENSCAFG00000018169	-2.2484	-0.331355	3.4688e-10	1.46507e-09
	ENSCAFG00000029799	-2.24089	3.03021	5.68437e-72	2.84684e-70
	ENSCAFG00000019014	-2.19332	0.197105	3.89601e-12	1.94032e-11
	ENSCAFG00000015135	-2.19048	4.2527	2.87928e-115	3.98266e-113
	ENSCAFG00000031669	-2.16339	2.52266	7.90201e-45	1.85108e-43
	ENSCAFG00000012553	-2.15855	0.218574	1.40887e-11	6.71991e-11
	ENSCAFG00000014245	-2.14488	2.07442	1.88353e-33	2.97347e-32
	ENSCAFG00000024167	-2.14232	3.2698	3.11334e-59	1.14113e-57
	ENSCAFG00000003282	-2.13553	1.28901	3.53992e-19	2.76599e-18
	ENSCAFG00000010594	-2.1328	3.05754	5.54234e-56	1.84517e-54
	ENSCAFG00000029390	-2.1281	0.234089	7.90848e-12	3.84311e-11
	ENSCAFG00000029135	-2.11917	2.72118	9.59748e-36	1.65205e-34
	ENSCAFG00000001646	-2.11844	4.71581	5.90606e-124	9.5309e-122
	ENSCAFG00000003600	-2.11807	0.763804	1.69321e-11	8.02339e-11
	ENSCAFG00000015769	-2.0943	1.88658	6.51978e-25	6.98187e-24
	ENSCAFG00000010949	-2.0933	4.29246	8.81829e-122	1.36613e-119
	ENSCAFG00000003169	-2.09225	8.80428	9.04843e-219	4.04361e-216
	ENSCAFG00000008626	-2.08272	0.315863	1.80165e-11	8.51295e-11
	ENSCAFG00000001305	-2.08163	0.204374	2.1722e-10	9.35808e-10
	ENSCAFG00000014200	-2.07668	1.14132	4.12144e-19	3.21173e-18
	ENSCAFG00000017863	-2.06789	2.63728	2.66898e-36	4.74172e-35
	ENSCAFG00000016396	-2.06212	1.3287	7.70452e-22	7.0046e-21
	ENSCAFG00000014463	-2.06178	2.09724	8.7547e-28	1.08214e-26
	ENSCAFG00000016262	-2.04828	2.90317	2.61773e-57	9.13374e-56
	ENSCAFG00000004406	-2.04401	1.25362	7.19417e-19	5.52108e-18
	ENSCAFG00000008575	-2.03779	-0.0580973	3.09444e-10	1.3146e-09
	ENSCAFG00000012046	-2.02648	0.54657	2.19222e-13	1.19136e-12
	ENSCAFG00000013843	-2.02517	1.13992	2.37474e-19	1.87319e-18
	ENSCAFG00000014774	-2.02021	0.544572	7.06994e-09	2.66361e-08
	ENSCAFG00000029080	-2.00845	2.66042	9.77047e-31	1.39121e-29
	ENSCAFG00000004542	-1.99108	5.03791	4.13859e-163	1.14491e-160
	ENSCAFG00000015633	-1.97785	1.04769	7.79328e-11	3.49885e-10
	ENSCAFG00000011021	-1.97703	0.14931	6.50864e-10	2.68742e-09
	ENSCAFG00000018622	-1.97198	4.66196	1.00684e-82	6.92218e-81
	ENSCAFG00000006966	-1.96548	4.37829	4.31594e-96	4.07698e-94
	ENSCAFG00000010739	-1.96459	0.265174	4.60406e-11	2.10691e-10
	ENSCAFG00000004299	-1.96209	2.11087	4.68707e-26	5.33913e-25
	ENSCAFG00000008099	-1.95537	3.02435	8.31315e-52	2.39679e-50
	ENSCAFG00000003720	-1.95286	2.08625	4.37358e-28	5.52354e-27
	ENSCAFG00000014796	-1.9516	0.581716	2.49269e-13	1.34961e-12
	ENSCAFG00000013867	-1.95011	0.576055	7.59215e-13	3.96464e-12
	ENSCAFG00000028993	-1.94747	1.97363	2.45245e-23	2.40668e-22
	ENSCAFG00000031840	-1.94466	-0.0391073	3.15167e-09	1.23048e-08
	ENSCAFG00000015464	-1.94345	3.78212	1.95869e-60	7.46164e-59
	ENSCAFG00000015750	-1.94292	2.78405	7.33312e-45	1.72477e-43
	ENSCAFG00000038856	-1.94288	1.58304	2.59584e-19	2.04343e-18
	ENSCAFG00000019451	-1.94241	3.46342	8.01612e-56	2.63851e-54
	ENSCAFG00000011603	-1.93241	1.39751	7.46309e-18	5.36927e-17
	ENSCAFG00000017669	-1.93155	4.78434	2.141e-119	3.18927e-117
	ENSCAFG00000002069	-1.92902	10.3039	1,23422851278591e-312	0
	ENSCAFG00000001607	-1.92287	1.35874	6.93676e-19	5.32705e-18
	ENSCAFG00000014621	-1.91539	2.01143	3.62312e-26	4.15568e-25
	ENSCAFG00000013291	-1.90987	3.49681	7.73258e-56	2.55241e-54
	ENSCAFG00000003276	-1.90961	4.39348	2.41333e-104	2.74907e-102
	ENSCAFG00000009877	-1.90308	0.384872	1.2338e-11	5.9018e-11
	ENSCAFG00000008318	-1.90212	1.37187	2.28101e-20	1.9122e-19
	ENSCAFG00000039329	-1.90155	1.25316	1.92953e-20	1.62223e-19
	ENSCAFG00000024487	-1.89546	1.20367	1.12173e-15	7.08338e-15
	ENSCAFG00000012675	-1.87466	1.59471	3.42242e-13	1.83334e-12
	ENSCAFG00000026385	-1.86742	1.04855	5.0961e-14	2.88837e-13
	ENSCAFG00000033145	-1.86548	1.6399	8.55147e-25	9.09886e-24
	ENSCAFG00000012891	-1.86238	5.14297	3.20242e-147	7.02055e-145
	ENSCAFG00000009800	-1.86211	0.0747496	1.82385e-09	7.24986e-09
	ENSCAFG00000011117	-1.8532	7.67843	3.58032e-238	1.98094e-235
	ENSCAFG00000019293	-1.84795	2.2471	4.60952e-25	4.98214e-24
	ENSCAFG00000017353	-1.84793	1.43943	9.79332e-15	5.81147e-14
	ENSCAFG00000001296	-1.81672	2.65525	7.91108e-44	1.80943e-42
	ENSCAFG00000016549	-1.81583	0.627035	1.89364e-08	6.82873e-08
	ENSCAFG00000040164	-1.8126	4.30614	6.67774e-103	7.46045e-101
	ENSCAFG00000001611	-1.81127	-0.265651	9.91785e-08	3.32907e-07
	ENSCAFG00000010901	-1.81071	5.5296	2.65493e-205	1.02825e-202
	ENSCAFG00000004355	-1.80217	2.39236	3.75472e-26	4.30238e-25
	ENSCAFG00000039703	-1.80193	1.15758	3.37605e-15	2.07218e-14
	ENSCAFG00000032405	-1.79834	1.04409	9.25875e-13	4.80256e-12
	ENSCAFG00000010790	-1.79691	3.90553	5.5967e-75	3.06736e-73
	ENSCAFG00000002627	-1.78509	4.07246	1.64876e-81	1.08846e-79
	ENSCAFG00000010970	-1.78472	1.51231	2.82498e-22	2.63642e-21
	ENSCAFG00000006381	-1.78312	8.79937	1.49358e-190	5.59802e-188
	ENSCAFG00000007047	-1.77457	4.06054	9.33721e-70	4.50162e-68
	ENSCAFG00000017144	-1.76954	1.05953	9.79215e-12	4.71509e-11
	ENSCAFG00000014361	-1.76918	0.657796	4.57213e-08	1.582e-07
	ENSCAFG00000011880	-1.76754	1.40878	1.29692e-19	1.03996e-18
	ENSCAFG00000006128	-1.76572	2.95128	4.35805e-30	5.97124e-29
	ENSCAFG00000035669	-1.75408	0.551964	1.9042e-08	6.86255e-08
	ENSCAFG00000002163	-1.74632	4.50481	3.85923e-32	5.78585e-31
	ENSCAFG00000037381	-1.74602	0.645959	1.70283e-10	7.40186e-10
	ENSCAFG00000032326	-1.7392	3.96343	2.59375e-57	9.07736e-56
	ENSCAFG00000013981	-1.73553	4.47088	1.73948e-109	2.15011e-107
	ENSCAFG00000020377	-1.73056	2.08086	6.31176e-18	4.56072e-17
	ENSCAFG00000000225	-1.72253	0.759896	5.85822e-13	3.08833e-12
	ENSCAFG00000012119	-1.72176	6.40797	4.93087e-163	1.33237e-160
	ENSCAFG00000008933	-1.72137	1.98759	1.85359e-22	1.7467e-21
	ENSCAFG00000011948	-1.72124	2.89741	6.08487e-36	1.05522e-34
	ENSCAFG00000020142	-1.72073	2.57991	2.64754e-27	3.19437e-26
	ENSCAFG00000014309	-1.71944	1.30077	3.00964e-11	1.39764e-10
	ENSCAFG00000007406	-1.71363	1.30052	8.85982e-15	5.27638e-14
	ENSCAFG00000031870	-1.70868	1.6157	5.11242e-15	3.08899e-14
	ENSCAFG00000009675	-1.70539	1.68011	3.0443e-21	2.67764e-20
	ENSCAFG00000018864	-1.69735	4.76362	2.38099e-44	5.47815e-43
	ENSCAFG00000006527	-1.6967	3.35834	8.49838e-53	2.55149e-51
	ENSCAFG00000029314	-1.68322	0.343479	1.34414e-09	5.39653e-09
	ENSCAFG00000001029	-1.68183	3.08974	1.67981e-35	2.87025e-34
	ENSCAFG00000002202	-1.68159	1.89492	8.10449e-19	6.20329e-18
	ENSCAFG00000012723	-1.67578	3.16044	3.43434e-45	8.16025e-44
	ENSCAFG00000019676	-1.65938	7.53226	1.06834e-221	5.17211e-219
	ENSCAFG00000016107	-1.65272	3.87817	3.7684e-38	7.2612e-37
	ENSCAFG00000009559	-1.64551	7.71942	4.43216e-213	1.83919e-210
	ENSCAFG00000000569	-1.64464	4.15341	5.95606e-79	3.62322e-77
	ENSCAFG00000018037	-1.63846	2.33887	1.24997e-22	1.18849e-21
	ENSCAFG00000011970	-1.63839	2.72695	1.82622e-39	3.65842e-38
	ENSCAFG00000015654	-1.63765	4.8966	1.16699e-101	1.24397e-99
	ENSCAFG00000000741	-1.61858	2.69741	6.01144e-18	4.35183e-17
	ENSCAFG00000039440	-1.61592	3.4093	3.16898e-35	5.37524e-34
	ENSCAFG00000000420	-1.6148	1.16078	1.94719e-08	7.01097e-08
	ENSCAFG00000006655	-1.60766	0.769769	7.73507e-07	2.37259e-06
	ENSCAFG00000019983	-1.60366	2.4686	2.02002e-17	1.41665e-16
	ENSCAFG00000003987	-1.60158	5.5567	8.11891e-124	1.29224e-121
	ENSCAFG00000029394	-1.59314	3.98699	3.37641e-57	1.17457e-55
	ENSCAFG00000013096	-1.59126	2.95419	2.5102e-18	1.87081e-17
	ENSCAFG00000009209	-1.58303	4.74742	5.25984e-49	1.36721e-47
	ENSCAFG00000003970	-1.57589	1.80098	2.51943e-18	1.87649e-17
	ENSCAFG00000016170	-1.57566	0.419172	1.21759e-07	4.0606e-07
	ENSCAFG00000012301	-1.56586	4.20194	6.37146e-60	2.38039e-58
	ENSCAFG00000025002	-1.56553	4.92848	5.3727e-91	4.5901e-89
	ENSCAFG00000028596	-1.55881	0.0156478	3.6888e-06	1.0487e-05
	ENSCAFG00000002948	-1.55875	0.294445	7.35145e-07	2.2591e-06
	ENSCAFG00000009850	-1.54799	2.27935	2.9225e-20	2.43222e-19
	ENSCAFG00000019015	-1.5474	1.67731	1.54728e-18	1.16967e-17
	ENSCAFG00000018284	-1.54501	4.509	5.76174e-36	1.00068e-34
	ENSCAFG00000016475	-1.54274	3.04299	4.717e-42	1.02443e-40
	ENSCAFG00000003402	-1.54052	8.53335	1.85058e-66	8.26997e-65
	ENSCAFG00000032412	-1.52603	0.771027	2.99505e-11	1.39142e-10
	ENSCAFG00000021344	-1.52296	0.390952	6.24461e-06	1.72424e-05
	ENSCAFG00000013175	-1.5218	3.00341	5.21035e-24	5.31044e-23
	ENSCAFG00000003624	-1.51628	0.836789	1.22793e-10	5.42482e-10
	ENSCAFG00000000577	-1.51563	4.6931	6.02016e-98	5.97848e-96
	ENSCAFG00000012932	-1.51231	1.6591	5.78726e-15	3.48585e-14
	ENSCAFG00000008170	-1.50965	2.87937	4.65346e-35	7.81338e-34
	ENSCAFG00000031441	-1.50808	2.57231	1.51346e-22	1.42966e-21
	ENSCAFG00000009195	-1.49822	1.69372	1.15654e-16	7.80362e-16
	ENSCAFG00000024991	-1.49569	0.765908	1.09535e-09	4.43292e-09
	ENSCAFG00000012931	-1.49458	2.45234	2.39631e-26	2.77318e-25
	ENSCAFG00000000678	-1.49166	2.24062	1.7342e-18	1.30334e-17
	ENSCAFG00000031999	-1.48807	6.35115	9.2272e-66	3.97077e-64
	ENSCAFG00000024888	-1.487	3.69853	1.00853e-49	2.68764e-48
	ENSCAFG00000019735	-1.48608	5.28642	1.28656e-61	5.05016e-60
	ENSCAFG00000007352	-1.486	2.75849	2.04962e-25	2.25945e-24
	ENSCAFG00000030192	-1.48319	3.42395	3.09995e-40	6.38624e-39
	ENSCAFG00000018466	-1.48217	2.60786	9.97223e-22	8.96806e-21
	ENSCAFG00000003102	-1.47765	1.53369	2.4488e-12	1.23439e-11
	ENSCAFG00000019130	-1.47563	2.05482	2.01222e-16	1.33983e-15
	ENSCAFG00000002939	-1.47521	0.885863	4.70158e-10	1.96432e-09
	ENSCAFG00000013064	-1.4737	-0.245182	4.94005e-05	0.000121568
	ENSCAFG00000006492	-1.47361	2.07743	3.87428e-21	3.38461e-20
	ENSCAFG00000005493	-1.46774	1.28941	2.58432e-11	1.20591e-10
	ENSCAFG00000020082	-1.46563	2.21786	2.75547e-18	2.04705e-17
	ENSCAFG00000011154	-1.45778	3.54483	6.24575e-37	1.1339e-35
	ENSCAFG00000008571	-1.45637	3.7804	6.6533e-52	1.93262e-50
	ENSCAFG00000017037	-1.45561	4.55104	3.40926e-70	1.6714e-68
	ENSCAFG00000008350	-1.44929	2.15038	9.5907e-13	4.97031e-12
	ENSCAFG00000017357	-1.44683	4.68328	3.23244e-73	1.69179e-71
	ENSCAFG00000006607	-1.44641	9.60772	6.87307e-242	3.99291e-239
	ENSCAFG00000003407	-1.445	2.49226	2.34426e-26	2.71836e-25
	ENSCAFG00000031691	-1.44484	3.45047	1.08178e-30	1.53658e-29
	ENSCAFG00000028797	-1.4405	0.957079	8.66663e-10	3.5407e-09
	ENSCAFG00000013925	-1.43894	1.58976	4.43983e-13	2.35554e-12
	ENSCAFG00000032147	-1.42919	0.737483	4.02837e-05	0.00010014
	ENSCAFG00000009094	-1.42685	3.06201	8.6315e-29	1.11681e-27
	ENSCAFG00000025462	-1.42648	3.32205	1.51974e-30	2.13259e-29
	ENSCAFG00000007616	-1.42622	4.12545	4.0214e-47	1.00483e-45
	ENSCAFG00000002917	-1.4245	7.34942	4.35553e-143	9.03695e-141
	ENSCAFG00000010982	-1.41651	5.27303	1.73248e-100	1.81349e-98
	ENSCAFG00000013661	-1.41389	0.52123	2.17353e-08	7.78253e-08
	ENSCAFG00000013663	-1.41114	1.60074	4.04525e-13	2.1526e-12
	ENSCAFG00000002498	-1.41054	3.97241	2.48377e-43	5.60368e-42
	ENSCAFG00000038082	-1.40696	0.391684	1.7125e-07	5.6351e-07
	ENSCAFG00000005497	-1.40568	4.52947	1.32519e-52	3.93796e-51
	ENSCAFG00000023562	-1.4036	3.8471	1.04508e-38	2.05114e-37
	ENSCAFG00000012986	-1.403	5.70958	1.13824e-109	1.42206e-107
	ENSCAFG00000029541	-1.39828	4.59147	9.0544e-79	5.47933e-77
	ENSCAFG00000009307	-1.39673	3.83875	2.49075e-52	7.34517e-51
	ENSCAFG00000010596	-1.39643	3.48836	4.97647e-25	5.36378e-24
	ENSCAFG00000014348	-1.39068	2.91865	1.35795e-25	1.5113e-24
	ENSCAFG00000028851	-1.38944	0.679323	7.08129e-06	1.94188e-05
	ENSCAFG00000000630	-1.38734	1.19617	6.47013e-09	2.44476e-08
	ENSCAFG00000015720	-1.38443	0.975296	3.41492e-08	1.19945e-07
	ENSCAFG00000017018	-1.38227	10.3324	4.76827e-166	1.42058e-163
	ENSCAFG00000010470	-1.38076	1.84151	7.18081e-15	4.30293e-14
	ENSCAFG00000003029	-1.37674	7.12359	6.14037e-53	1.85312e-51
	ENSCAFG00000006596	-1.37194	0.157294	4.60677e-06	1.29165e-05
	ENSCAFG00000015502	-1.36762	1.72374	7.80666e-15	4.66592e-14
	ENSCAFG00000013001	-1.36475	0.937553	1.92909e-08	6.94794e-08
	ENSCAFG00000009305	-1.36383	4.62892	1.50433e-59	5.53126e-58
	ENSCAFG00000005191	-1.36286	5.89653	4.27558e-102	4.59981e-100
	ENSCAFG00000018012	-1.36212	5.04212	5.69264e-75	3.1053e-73
	ENSCAFG00000036684	-1.36101	3.37501	2.16475e-35	3.68801e-34
	ENSCAFG00000015727	-1.35257	0.87499	1.21097e-05	3.21828e-05
	ENSCAFG00000007268	-1.35218	0.923873	1.6263e-09	6.48453e-09
	ENSCAFG00000010617	-1.35136	1.49557	3.4755e-12	1.73611e-11
	ENSCAFG00000008586	-1.34973	3.84515	3.26852e-34	5.35641e-33
	ENSCAFG00000010695	-1.34759	0.196179	1.05731e-06	3.19253e-06
	ENSCAFG00000011155	-1.34439	2.32228	2.1387e-16	1.42078e-15
	ENSCAFG00000012826	-1.34356	1.63241	4.51858e-10	1.89263e-09
	ENSCAFG00000018729	-1.3408	-0.0490504	1.90453e-05	4.94387e-05
	ENSCAFG00000004258	-1.33857	0.847717	1.78184e-05	4.64302e-05
	ENSCAFG00000016394	-1.33398	2.97379	2.48768e-28	3.1833e-27
	ENSCAFG00000009512	-1.33121	5.29354	1.85963e-90	1.57715e-88
	ENSCAFG00000005887	-1.32951	6.66713	9.97835e-128	1.73042e-125
	ENSCAFG00000028461	-1.32853	10.9238	3.61363e-99	3.68305e-97
	ENSCAFG00000002492	-1.32318	0.235147	7.59314e-06	2.07392e-05
	ENSCAFG00000015383	-1.32275	2.54542	3.51404e-16	2.30416e-15
	ENSCAFG00000004369	-1.32248	0.0827968	7.49105e-05	0.000179609
	ENSCAFG00000019644	-1.32155	5.7529	6.49015e-127	1.10896e-124
	ENSCAFG00000015316	-1.31853	1.82864	2.33065e-13	1.26541e-12
	ENSCAFG00000010595	-1.31749	4.67366	4.17553e-73	2.17558e-71
	ENSCAFG00000028577	-1.31497	0.605674	6.37647e-07	1.97463e-06
	ENSCAFG00000017615	-1.3088	0.308959	4.14289e-06	1.16977e-05
	ENSCAFG00000006180	-1.30201	5.03711	1.43535e-89	1.17446e-87
	ENSCAFG00000007905	-1.29906	4.97285	1.59145e-61	6.22594e-60
	ENSCAFG00000014866	-1.29838	2.4426	6.93086e-15	4.15744e-14
	ENSCAFG00000019359	-1.29573	5.51847	3.43367e-56	1.14973e-54
	ENSCAFG00000006979	-1.29503	0.107509	1.51448e-05	3.97846e-05
	ENSCAFG00000002248	-1.295	2.57063	1.97541e-21	1.74941e-20
	ENSCAFG00000012542	-1.29469	5.41182	8.09572e-70	3.91934e-68
	ENSCAFG00000026013	-1.29402	1.11151	3.67478e-08	1.28568e-07
	ENSCAFG00000024440	-1.29228	0.241928	2.19563e-06	6.39533e-06
	ENSCAFG00000023182	-1.29098	0.600185	3.21787e-06	9.21123e-06
	ENSCAFG00000028708	-1.28992	3.85832	3.4757e-37	6.3899e-36
	ENSCAFG00000014543	-1.28902	4.58488	5.91377e-52	1.73078e-50
	ENSCAFG00000018572	-1.28425	7.43618	1.34883e-150	3.07296e-148
	ENSCAFG00000002222	-1.27945	7.12008	5.98006e-153	1.41801e-150
	ENSCAFG00000014880	-1.27866	7.66988	1.37389e-86	1.02989e-84
	ENSCAFG00000008274	-1.27755	6.14371	7.63116e-104	8.60839e-102
	ENSCAFG00000016252	-1.27688	2.07567	2.96137e-11	1.37688e-10
	ENSCAFG00000000103	-1.27408	4.51656	2.05412e-55	6.68539e-54
	ENSCAFG00000017030	-1.2735	3.01144	3.50923e-24	3.6179e-23
	ENSCAFG00000013260	-1.27334	0.463555	2.36559e-06	6.86458e-06
	ENSCAFG00000023269	-1.27166	3.99773	1.3801e-29	1.86458e-28
	ENSCAFG00000010955	-1.26967	1.27883	3.59166e-08	1.25811e-07
	ENSCAFG00000028156	-1.26862	0.749821	2.14758e-07	7.00919e-07
	ENSCAFG00000007328	-1.26454	5.96002	6.81529e-82	4.55097e-80
	ENSCAFG00000012143	-1.26194	5.10223	8.75924e-81	5.68568e-79
	ENSCAFG00000031616	-1.25967	1.13755	1.75163e-06	5.17211e-06
	ENSCAFG00000039058	-1.25479	0.764778	8.55501e-06	2.31973e-05
	ENSCAFG00000002573	-1.25207	2.91905	5.53546e-28	6.98333e-27
	ENSCAFG00000030246	-1.25205	-0.0386512	3.59839e-05	9.00878e-05
	ENSCAFG00000013273	-1.24814	0.640406	3.61519e-06	1.02903e-05
	ENSCAFG00000030725	-1.24673	2.64166	2.39701e-20	2.00511e-19
	ENSCAFG00000012497	-1.24499	0.888691	2.34611e-05	6.02418e-05
	ENSCAFG00000012981	-1.24026	6.17657	1.28481e-131	2.40778e-129
	ENSCAFG00000003892	-1.23627	1.62689	3.04705e-10	1.29541e-09
	ENSCAFG00000003404	-1.23552	8.28319	1.70404e-89	1.38457e-87
	ENSCAFG00000005365	-1.23436	2.96061	2.9046e-25	3.17484e-24
	ENSCAFG00000010930	-1.2341	0.821176	9.02957e-07	2.75005e-06
	ENSCAFG00000029607	-1.23295	1.08593	5.22612e-07	1.6354e-06
	ENSCAFG00000005144	-1.23278	2.24219	1.90146e-13	1.03675e-12
	ENSCAFG00000008761	-1.23127	3.34129	3.15979e-25	3.44405e-24
	ENSCAFG00000011984	-1.23082	4.63232	2.23982e-33	3.53114e-32
	ENSCAFG00000005675	-1.22781	1.93454	3.22247e-14	1.84625e-13
	ENSCAFG00000005044	-1.22144	6.41836	6.1672e-117	8.73863e-115
	ENSCAFG00000029267	-1.22136	2.98089	5.09018e-22	4.66531e-21
	ENSCAFG00000005941	-1.22106	5.46584	3.36628e-90	2.83426e-88
	ENSCAFG00000019945	-1.2204	0.398851	0.000150071	0.000345009
	ENSCAFG00000006521	-1.21373	4.41972	1.23574e-21	1.10532e-20
	ENSCAFG00000018129	-1.21361	5.94342	3.81431e-59	1.39366e-57
	ENSCAFG00000025152	-1.21298	0.0832102	1.72583e-05	4.50314e-05
	ENSCAFG00000000107	-1.21222	6.00946	8.39099e-105	9.74949e-103
	ENSCAFG00000004295	-1.20764	6.43369	2.32739e-102	2.55112e-100
	ENSCAFG00000039558	-1.20726	-0.00219677	9.01531e-05	0.000214079
	ENSCAFG00000018136	-1.20441	3.82916	6.95537e-30	9.47414e-29
	ENSCAFG00000001974	-1.20309	4.77636	1.3968e-46	3.46043e-45
	ENSCAFG00000035589	-1.19892	0.377828	1.00209e-05	2.69394e-05
	ENSCAFG00000026209	-1.19792	1.51541	5.44748e-11	2.4763e-10
	ENSCAFG00000007100	-1.19685	2.29594	5.294e-11	2.40936e-10
	ENSCAFG00000019269	-1.19482	2.01638	6.51749e-07	2.01508e-06
	ENSCAFG00000004261	-1.19248	3.745	2.67695e-26	3.0826e-25
	ENSCAFG00000011353	-1.19224	0.846896	1.40295e-07	4.65208e-07
	ENSCAFG00000016497	-1.18542	5.74279	2.688e-75	1.48018e-73
	ENSCAFG00000031353	-1.18366	0.385	1.23186e-05	3.26931e-05
	ENSCAFG00000001778	-1.18348	11.7116	4.92035e-184	1.73241e-181
	ENSCAFG00000008519	-1.18138	1.75322	2.64681e-08	9.40754e-08
	ENSCAFG00000005834	-1.18008	1.06218	2.96337e-07	9.5246e-07
	ENSCAFG00000012969	-1.17948	6.37681	1.24709e-126	2.07e-124
	ENSCAFG00000004840	-1.17929	0.450124	0.000458182	0.000979686
	ENSCAFG00000011851	-1.17015	3.51191	9.81266e-24	9.84571e-23
	ENSCAFG00000018275	-1.16994	2.67063	1.59898e-19	1.27164e-18
	ENSCAFG00000026247	-1.16547	0.469813	0.000162003	0.000370096
	ENSCAFG00000015250	-1.16342	0.814999	0.000101361	0.000238742
	ENSCAFG00000011587	-1.15554	4.30195	1.6584e-42	3.67027e-41
	ENSCAFG00000032541	-1.15517	-0.0666686	0.000242556	0.000539586
	ENSCAFG00000011335	-1.1551	3.71618	1.52857e-31	2.23965e-30
	ENSCAFG00000013228	-1.15137	2.0601	1.9951e-10	8.6239e-10
	ENSCAFG00000029227	-1.15115	6.9039	1.46977e-73	7.79782e-72
	ENSCAFG00000026472	-1.15043	0.364557	1.01102e-05	2.71647e-05
	ENSCAFG00000029313	-1.15021	1.07868	3.50361e-06	9.98491e-06
	ENSCAFG00000005993	-1.14983	2.66651	7.46782e-20	6.08049e-19
	ENSCAFG00000013158	-1.14513	4.04334	1.55106e-34	2.5672e-33
	ENSCAFG00000004491	-1.14416	7.43094	7.64498e-131	1.40995e-128
	ENSCAFG00000016062	-1.13379	1.22039	9.60107e-08	3.2316e-07
	ENSCAFG00000005103	-1.13358	1.71452	2.26026e-10	9.71943e-10
	ENSCAFG00000030167	-1.13188	5.86261	6.46126e-71	3.19461e-69
	ENSCAFG00000031204	-1.12952	1.17755	3.24092e-08	1.14283e-07
	ENSCAFG00000030867	-1.12921	0.92889	2.76239e-07	8.90572e-07
	ENSCAFG00000011868	-1.1274	7.63943	4.30236e-89	3.40062e-87
	ENSCAFG00000013922	-1.12279	1.58096	4.68725e-07	1.47312e-06
	ENSCAFG00000007693	-1.12163	5.16636	1.07561e-50	2.93368e-49
	ENSCAFG00000030990	-1.12099	1.67746	8.15554e-11	3.65302e-10
	ENSCAFG00000006505	-1.11971	3.44828	1.67123e-23	1.65682e-22
	ENSCAFG00000010107	-1.11919	2.26534	8.81565e-12	4.26965e-11
	ENSCAFG00000024871	-1.11676	0.974504	1.61159e-06	4.78046e-06
	ENSCAFG00000029007	-1.11673	1.18033	2.6435e-08	9.39867e-08
	ENSCAFG00000001456	-1.11408	6.1804	6.41886e-78	3.74777e-76
	ENSCAFG00000017877	-1.11173	6.74595	1.49745e-95	1.39191e-93
	ENSCAFG00000011716	-1.1116	5.49521	3.33923e-80	2.13179e-78
	ENSCAFG00000023582	-1.11075	3.65414	1.05684e-25	1.18642e-24
	ENSCAFG00000013863	-1.10848	1.83395	5.65496e-10	2.34829e-09
	ENSCAFG00000016855	-1.10597	2.34776	4.06692e-10	1.70961e-09
	ENSCAFG00000011654	-1.1054	2.31735	1.14334e-12	5.8911e-12
	ENSCAFG00000019257	-1.10426	1.78065	1.17111e-11	5.61351e-11
	ENSCAFG00000026367	-1.10412	1.72188	6.34121e-09	2.39783e-08
	ENSCAFG00000000296	-1.10412	7.97897	1.64945e-64	6.84461e-63
	ENSCAFG00000009300	-1.10384	0.172848	0.000109429	0.000256394
	ENSCAFG00000033460	-1.10269	0.257371	0.000235211	0.00052425
	ENSCAFG00000039304	-1.10187	0.418656	3.33234e-05	8.3897e-05
	ENSCAFG00000002838	-1.10044	6.28469	5.37592e-80	3.41327e-78
	ENSCAFG00000016870	-1.10042	1.1408	6.22113e-07	1.92961e-06
	ENSCAFG00000005579	-1.09809	2.85111	4.95172e-17	3.40036e-16
	ENSCAFG00000017774	-1.09665	1.40931	1.41569e-07	4.69298e-07
	ENSCAFG00000036991	-1.09454	0.391382	7.09572e-05	0.000170659
	ENSCAFG00000006914	-1.0943	2.00543	8.65693e-09	3.22698e-08
	ENSCAFG00000005061	-1.09356	8.13822	2.49869e-113	3.37584e-111
	ENSCAFG00000018117	-1.0916	4.25816	1.60346e-41	3.42475e-40
	ENSCAFG00000017932	-1.08843	1.22322	2.95934e-07	9.51428e-07
	ENSCAFG00000008708	-1.08509	4.1004	2.9502e-19	2.3161e-18
	ENSCAFG00000008640	-1.0849	11.6166	1.00108e-77	5.81578e-76
	ENSCAFG00000020218	-1.08396	4.33244	9.08259e-29	1.17387e-27
	ENSCAFG00000038013	-1.08299	1.2275	2.84092e-06	8.1826e-06
	ENSCAFG00000023437	-1.08071	1.32202	9.28755e-07	2.82418e-06
	ENSCAFG00000015662	-1.07934	2.72211	8.56908e-15	5.10847e-14
	ENSCAFG00000029717	-1.07812	0.204342	0.000107696	0.000252741
	ENSCAFG00000006188	-1.07565	0.513962	0.000577855	0.00121853
	ENSCAFG00000003241	-1.07307	0.557625	1.33653e-05	3.52854e-05
	ENSCAFG00000028878	-1.073	3.25672	2.21677e-23	2.18276e-22
	ENSCAFG00000008425	-1.072	2.611	6.49757e-10	2.6838e-09
	ENSCAFG00000001246	-1.06943	3.97862	4.05059e-27	4.85695e-26
	ENSCAFG00000012260	-1.06937	5.18988	4.38042e-56	1.46253e-54
	ENSCAFG00000025787	-1.06905	1.77072	4.51557e-10	1.89204e-09
	ENSCAFG00000015105	-1.06825	4.87305	5.16562e-33	8.03472e-32
	ENSCAFG00000000783	-1.06679	3.59686	8.53631e-28	1.05627e-26
	ENSCAFG00000025805	-1.0664	0.476113	0.000317308	0.000694052
	ENSCAFG00000001570	-1.06538	7.47123	2.25324e-111	2.94162e-109
	ENSCAFG00000012102	-1.06332	2.78038	7.39186e-11	3.32505e-10
	ENSCAFG00000026374	-1.06302	0.83578	7.81642e-06	2.1309e-05
	ENSCAFG00000026246	-1.06241	0.350758	4.43785e-05	0.000109686
	ENSCAFG00000002793	-1.06187	1.44469	3.05588e-09	1.19509e-08
	ENSCAFG00000007617	-1.06145	0.24187	0.000125369	0.000291058
	ENSCAFG00000037238	-1.05952	0.785594	0.000507744	0.0010797
	ENSCAFG00000011275	-1.05711	5.55059	2.94402e-46	7.24715e-45
	ENSCAFG00000010717	-1.0569	3.1135	1.30101e-21	1.16191e-20
	ENSCAFG00000007357	-1.05567	3.2117	2.63682e-19	2.07288e-18
	ENSCAFG00000006371	-1.05453	6.60872	3.90464e-69	1.85176e-67
	ENSCAFG00000015791	-1.05133	2.62027	7.4188e-12	3.61119e-11
	ENSCAFG00000000832	-1.05131	5.04891	3.85371e-33	6.01024e-32
	ENSCAFG00000016828	-1.05056	3.55621	2.03488e-25	2.24746e-24
	ENSCAFG00000004318	-1.05005	3.21206	2.22868e-12	1.12685e-11
	ENSCAFG00000007790	-1.04797	5.40113	1.22199e-58	4.39577e-57
	ENSCAFG00000010759	-1.04482	4.44511	2.91617e-36	5.15723e-35
	ENSCAFG00000037687	-1.04232	-0.0395436	0.00191106	0.00373627
	ENSCAFG00000016618	-1.04216	2.46817	1.73806e-12	8.86893e-12
	ENSCAFG00000007127	-1.04203	5.39136	2.03082e-54	6.50029e-53
	ENSCAFG00000008281	-1.04056	4.12445	3.57834e-21	3.13078e-20
	ENSCAFG00000005669	-1.03804	5.73384	1.94404e-72	9.99458e-71
	ENSCAFG00000006420	-1.03627	3.73546	1.28403e-18	9.75109e-18
	ENSCAFG00000012150	-1.03589	3.56203	6.12605e-21	5.28423e-20
	ENSCAFG00000019231	-1.03383	2.55839	6.1643e-13	3.24086e-12
	ENSCAFG00000031910	-1.03029	0.307942	0.000297808	0.000654232
	ENSCAFG00000010142	-1.02921	6.9153	1.52245e-52	4.5126e-51
	ENSCAFG00000012724	-1.02858	7.453	6.19685e-88	4.83229e-86
	ENSCAFG00000006975	-1.02372	7.71184	5.86667e-65	2.46974e-63
	ENSCAFG00000010633	-1.02342	2.42201	5.03657e-09	1.92184e-08
	ENSCAFG00000017469	-1.02126	0.546349	3.23353e-05	8.1586e-05
	ENSCAFG00000005350	-1.0211	2.8746	5.42258e-14	3.06296e-13
	ENSCAFG00000031620	-1.02084	1.03706	0.000940321	0.00191946
	ENSCAFG00000017337	-1.0203	2.66194	9.44242e-11	4.20673e-10
	ENSCAFG00000000661	-1.01972	10.2349	5.64079e-81	3.68204e-79
	ENSCAFG00000022659	-1.01922	2.08989	4.18394e-08	1.45461e-07
	ENSCAFG00000018073	-1.01878	5.1246	5.40615e-50	1.44733e-48
	ENSCAFG00000013543	-1.01453	2.91215	2.22054e-17	1.55331e-16
	ENSCAFG00000016896	-1.01263	3.7998	1.70953e-25	1.89352e-24
	ENSCAFG00000030863	-1.01258	0.323239	0.000280092	0.000618588
	ENSCAFG00000025916	-1.01159	0.202644	0.00142742	0.0028357
	ENSCAFG00000025973	-1.01108	1.56938	1.14477e-05	3.0507e-05
	ENSCAFG00000016410	-1.01067	2.71911	2.27505e-12	1.1488e-11
	ENSCAFG00000016788	-1.00959	6.80182	9.01095e-76	5.00948e-74
	ENSCAFG00000014837	-1.00812	10.7165	2.74312e-87	2.11075e-85
	ENSCAFG00000019734	-1.0072	3.53468	1.84422e-14	1.07678e-13
	ENSCAFG00000008677	-1.00161	4.20186	9.92451e-36	1.70581e-34
	ENSCAFG00000019633	-1.00146	6.50969	1.33444e-78	8.03362e-77
	ENSCAFG00000009187	1.00155	7.39495	1.41788e-49	3.74418e-48
	ENSCAFG00000032499	1.00164	4.42028	2.35732e-36	4.19444e-35
	ENSCAFG00000028508	1.00236	6.65945	1.08562e-81	7.20791e-80
	ENSCAFG00000010609	1.00592	2.23183	2.56305e-10	1.09647e-09
	ENSCAFG00000024385	1.00695	4.05138	1.0257e-25	1.15369e-24
	ENSCAFG00000003196	1.00716	6.04555	3.02295e-77	1.72175e-75
	ENSCAFG00000015089	1.00752	5.68334	2.78614e-58	9.9914e-57
	ENSCAFG00000004447	1.00794	7.82886	3.01145e-73	1.58326e-71
	ENSCAFG00000005462	1.00814	0.0497696	0.00069776	0.0014537
	ENSCAFG00000019019	1.0086	7.04654	3.21984e-89	2.58009e-87
	ENSCAFG00000030839	1.00903	6.10783	2.58559e-26	2.98332e-25
	ENSCAFG00000029297	1.00909	1.19221	6.71417e-07	2.07424e-06
	ENSCAFG00000018234	1.00947	4.81827	1.67558e-41	3.57222e-40
	ENSCAFG00000008811	1.01048	3.67306	3.10906e-24	3.21389e-23
	ENSCAFG00000011693	1.01154	0.841642	0.00115455	0.00232531
	ENSCAFG00000002727	1.01205	6.56276	4.65441e-44	1.06666e-42
	ENSCAFG00000016987	1.01242	10.2803	2.85892e-117	4.10095e-115
	ENSCAFG00000016671	1.01371	1.56459	1.18601e-06	3.56632e-06
	ENSCAFG00000004803	1.01387	1.1072	4.40741e-06	1.24097e-05
	ENSCAFG00000004481	1.01389	7.58572	4.77836e-57	1.64747e-55
	ENSCAFG00000011077	1.01415	2.36039	1.5209e-11	7.23939e-11
	ENSCAFG00000007225	1.0154	0.483645	5.49564e-05	0.000134231
	ENSCAFG00000029052	1.01712	3.03792	4.01341e-18	2.957e-17
	ENSCAFG00000030548	1.01923	3.47789	1.22202e-15	7.70409e-15
	ENSCAFG00000031654	1.01928	1.93903	1.99325e-10	8.62234e-10
	ENSCAFG00000015840	1.02032	5.71283	5.05796e-66	2.20934e-64
	ENSCAFG00000012205	1.02079	5.6461	3.05633e-60	1.15672e-58
	ENSCAFG00000029948	1.02145	1.47891	2.66576e-07	8.61092e-07
	ENSCAFG00000018031	1.02276	0.436769	0.00055584	0.00117424
	ENSCAFG00000016571	1.02331	2.25202	7.24154e-06	1.98349e-05
	ENSCAFG00000019437	1.02446	0.786541	2.37731e-05	6.0989e-05
	ENSCAFG00000002448	1.02555	4.8354	1.31441e-23	1.30867e-22
	ENSCAFG00000012489	1.02587	1.24217	1.14431e-05	3.05019e-05
	ENSCAFG00000030813	1.02599	2.99561	5.14883e-14	2.91541e-13
	ENSCAFG00000012079	1.02668	6.15957	4.34259e-61	1.68189e-59
	ENSCAFG00000010095	1.02896	7.84659	1.22397e-89	1.00861e-87
	ENSCAFG00000000329	1.02958	1.06029	3.38928e-05	8.52566e-05
	ENSCAFG00000006229	1.03582	4.15027	2.29803e-14	1.33304e-13
	ENSCAFG00000012682	1.03786	1.68295	5.67175e-07	1.76676e-06
	ENSCAFG00000006227	1.03807	3.76465	5.10893e-14	2.89423e-13
	ENSCAFG00000015695	1.03812	0.969786	3.28845e-05	8.28637e-05
	ENSCAFG00000005749	1.0396	5.33996	4.76332e-72	2.40631e-70
	ENSCAFG00000000588	1.04412	6.47595	2.98701e-77	1.70966e-75
	ENSCAFG00000017241	1.04753	4.30984	3.12777e-20	2.59027e-19
	ENSCAFG00000007869	1.05323	0.0329729	0.0010548	0.00213561
	ENSCAFG00000012407	1.05416	4.50857	1.852e-37	3.43196e-36
	ENSCAFG00000009553	1.05429	0.888656	0.000425893	0.000915702
	ENSCAFG00000030354	1.05648	1.87203	2.1888e-08	7.83236e-08
	ENSCAFG00000023394	1.0595	3.87635	8.22575e-30	1.11784e-28
	ENSCAFG00000014822	1.05994	5.87392	2.0454e-51	5.82487e-50
	ENSCAFG00000000217	1.06093	4.12134	1.12644e-21	1.00911e-20
	ENSCAFG00000022297	1.0613	0.0417427	0.00411258	0.00759201
	ENSCAFG00000035346	1.06153	2.29302	4.36698e-13	2.31901e-12
	ENSCAFG00000007915	1.06275	5.35205	2.43387e-67	1.11775e-65
	ENSCAFG00000016531	1.06332	4.68303	4.9559e-41	1.03752e-39
	ENSCAFG00000000312	1.065	5.17537	4.48187e-40	9.1681e-39
	ENSCAFG00000000001	1.06569	4.68487	9.92818e-34	1.58021e-32
	ENSCAFG00000001515	1.06901	3.36332	7.39593e-15	4.42727e-14
	ENSCAFG00000019515	1.06955	4.80363	6.00178e-54	1.88983e-52
	ENSCAFG00000032656	1.0696	3.63455	3.94079e-24	4.03774e-23
	ENSCAFG00000018897	1.06978	6.39842	1.94225e-95	1.79103e-93
	ENSCAFG00000031257	1.07083	1.21923	8.84069e-08	2.98258e-07
	ENSCAFG00000023549	1.07396	6.39066	3.16486e-51	8.88225e-50
	ENSCAFG00000031931	1.07525	1.21998	3.44156e-08	1.20845e-07
	ENSCAFG00000020360	1.07561	6.83773	6.09633e-86	4.51167e-84
	ENSCAFG00000007562	1.07997	5.57208	5.3839e-37	9.80494e-36
	ENSCAFG00000019970	1.08042	4.94547	1.34281e-42	2.9775e-41
	ENSCAFG00000006255	1.08347	3.46808	1.04604e-19	8.45784e-19
	ENSCAFG00000031985	1.08508	4.67074	1.17747e-41	2.53822e-40
	ENSCAFG00000009127	1.08516	5.63726	1.62418e-61	6.33265e-60
	ENSCAFG00000040548	1.0868	1.05334	3.13356e-07	1.00272e-06
	ENSCAFG00000018925	1.08823	5.754	1.39313e-49	3.6956e-48
	ENSCAFG00000001225	1.09263	6.22732	1.84081e-85	1.32847e-83
	ENSCAFG00000000144	1.09319	2.58767	5.96147e-16	3.85027e-15
	ENSCAFG00000004555	1.09327	7.43629	2.69907e-33	4.2379e-32
	ENSCAFG00000001867	1.09515	0.87131	6.52665e-05	0.000157657
	ENSCAFG00000016932	1.09825	7.17991	2.13963e-100	2.21968e-98
	ENSCAFG00000029321	1.1002	4.06196	3.47602e-16	2.28051e-15
	ENSCAFG00000005655	1.10104	2.64791	1.86311e-11	8.79264e-11
	ENSCAFG00000004094	1.10174	2.32695	2.35603e-11	1.10337e-10
	ENSCAFG00000019258	1.1027	3.71979	6.96414e-18	5.01651e-17
	ENSCAFG00000020411	1.10273	3.3428	9.46989e-24	9.52646e-23
	ENSCAFG00000034880	1.10388	1.7918	1.4242e-09	5.70418e-09
	ENSCAFG00000009379	1.10639	2.51005	1.15583e-11	5.54252e-11
	ENSCAFG00000004597	1.10742	2.63556	1.12521e-17	8.00598e-17
	ENSCAFG00000023467	1.10768	1.47942	2.26055e-06	6.57785e-06
	ENSCAFG00000006231	1.10806	0.577626	0.000219616	0.000490904
	ENSCAFG00000011405	1.10962	6.81071	3.28339e-102	3.56539e-100
	ENSCAFG00000004584	1.10994	8.5071	4.02118e-139	8.05554e-137
	ENSCAFG00000003714	1.10994	3.48388	1.21184e-23	1.2107e-22
	ENSCAFG00000003568	1.11054	1.34738	1.5212e-08	5.52684e-08
	ENSCAFG00000001627	1.11074	5.65473	4.26922e-89	3.39754e-87
	ENSCAFG00000029903	1.11311	0.881807	9.3154e-07	2.83191e-06
	ENSCAFG00000016071	1.11427	9.19411	3.37341e-55	1.09485e-53
	ENSCAFG00000007680	1.11517	1.77912	7.07804e-10	2.91217e-09
	ENSCAFG00000012504	1.11528	2.6759	3.77927e-17	2.61533e-16
	ENSCAFG00000009881	1.11557	7.37415	7.48844e-92	6.49315e-90
	ENSCAFG00000019523	1.12219	0.45165	1.62685e-05	4.26016e-05
	ENSCAFG00000031382	1.12295	0.678898	2.08969e-06	6.10512e-06
	ENSCAFG00000009168	1.12303	4.11664	4.92024e-34	7.95109e-33
	ENSCAFG00000019811	1.12759	2.90057	1.60611e-19	1.27643e-18
	ENSCAFG00000028859	1.12896	1.2596	2.08917e-08	7.50126e-08
	ENSCAFG00000016333	1.13012	7.39088	4.33416e-93	3.90377e-91
	ENSCAFG00000003916	1.13049	0.974102	9.01168e-07	2.74604e-06
	ENSCAFG00000010195	1.13164	2.87531	5.01623e-23	4.84485e-22
	ENSCAFG00000019744	1.13339	0.250028	9.87802e-05	0.000233136
	ENSCAFG00000018220	1.13687	0.357439	0.00010923	0.00025598
	ENSCAFG00000007383	1.13781	5.5164	1.04586e-55	3.43272e-54
	ENSCAFG00000003010	1.13862	6.41998	3.84775e-66	1.69989e-64
	ENSCAFG00000030458	1.14027	0.897939	8.62123e-05	0.000205309
	ENSCAFG00000010848	1.14174	0.464866	6.68437e-05	0.000161291
	ENSCAFG00000011398	1.14336	3.77377	1.63169e-34	2.69682e-33
	ENSCAFG00000003465	1.14701	3.8335	2.7246e-28	3.48263e-27
	ENSCAFG00000023570	1.14819	2.1737	1.02893e-08	3.79286e-08
	ENSCAFG00000019630	1.15005	2.20282	7.58398e-13	3.96215e-12
	ENSCAFG00000017795	1.15182	1.27476	9.70603e-09	3.58925e-08
	ENSCAFG00000008005	1.15188	2.1068	4.20797e-09	1.6211e-08
	ENSCAFG00000014054	1.15317	2.09561	3.81153e-14	2.17302e-13
	ENSCAFG00000001516	1.15399	0.532291	0.000176329	0.000400072
	ENSCAFG00000018332	1.15731	4.32791	1.20072e-43	2.72484e-42
	ENSCAFG00000031039	1.15862	4.81562	1.97923e-44	4.59015e-43
	ENSCAFG00000000175	1.16062	0.668282	6.04508e-06	1.67153e-05
	ENSCAFG00000009061	1.16069	3.68327	3.22765e-29	4.27131e-28
	ENSCAFG00000018351	1.1622	0.234186	5.00836e-05	0.000123106
	ENSCAFG00000004567	1.16534	11.2463	1.08338e-105	1.28446e-103
	ENSCAFG00000005595	1.16642	4.91568	2.81127e-53	8.57328e-52
	ENSCAFG00000002393	1.16707	5.8867	3.57888e-76	1.99919e-74
	ENSCAFG00000007326	1.16733	1.12088	1.50419e-08	5.46673e-08
	ENSCAFG00000010229	1.16785	1.2143	1.02141e-07	3.42207e-07
	ENSCAFG00000018883	1.16802	4.0258	2.99253e-29	3.97829e-28
	ENSCAFG00000013394	1.16843	0.377694	2.82857e-05	7.18521e-05
	ENSCAFG00000006411	1.16938	5.63205	4.28415e-90	3.55554e-88
	ENSCAFG00000002169	1.17002	5.51288	7.14868e-60	2.6622e-58
	ENSCAFG00000012028	1.1712	1.08115	6.81961e-06	1.87499e-05
	ENSCAFG00000006406	1.17401	-0.0667578	0.000846559	0.00174184
	ENSCAFG00000018287	1.17965	3.61069	6.95881e-31	9.96971e-30
	ENSCAFG00000030112	1.18172	5.26461	1.71465e-60	6.55345e-59
	ENSCAFG00000014354	1.18371	0.880957	2.34437e-06	6.80809e-06
	ENSCAFG00000002066	1.18402	2.5502	9.27004e-12	4.47666e-11
	ENSCAFG00000002147	1.1851	3.1	4.61109e-22	4.24535e-21
	ENSCAFG00000006224	1.18578	5.23158	2.3005e-42	5.03381e-41
	ENSCAFG00000009055	1.18622	3.28308	4.2651e-24	4.35851e-23
	ENSCAFG00000014965	1.1864	3.50542	7.622e-26	8.59806e-25
	ENSCAFG00000014687	1.18983	3.43588	1.50606e-22	1.425e-21
	ENSCAFG00000007627	1.19236	2.57887	1.67607e-15	1.04813e-14
	ENSCAFG00000015587	1.19363	0.343807	0.00019638	0.000441941
	ENSCAFG00000005528	1.19582	5.19886	4.1734e-65	1.76974e-63
	ENSCAFG00000011736	1.19589	3.20266	1.89004e-22	1.77961e-21
	ENSCAFG00000005913	1.19665	5.08066	7.8871e-43	1.77254e-41
	ENSCAFG00000018418	1.1969	4.13749	8.23431e-44	1.87965e-42
	ENSCAFG00000012011	1.19762	5.17493	1.1771e-56	4.01077e-55
	ENSCAFG00000007429	1.19832	4.96166	5.38911e-63	2.17417e-61
	ENSCAFG00000008408	1.20074	5.03286	2.98358e-72	1.52045e-70
	ENSCAFG00000018556	1.2008	1.68195	7.76638e-11	3.48812e-10
	ENSCAFG00000010052	1.20163	8.23783	3.20659e-122	5.03478e-120
	ENSCAFG00000019379	1.20205	2.14221	1.08227e-11	5.19622e-11
	ENSCAFG00000016280	1.20383	1.81124	1.85522e-13	1.01201e-12
	ENSCAFG00000029248	1.20405	1.58299	4.0118e-11	1.84314e-10
	ENSCAFG00000012976	1.20538	5.61434	1.86563e-102	2.06446e-100
	ENSCAFG00000009385	1.20666	2.86829	9.40659e-12	4.53883e-11
	ENSCAFG00000017122	1.20763	4.28908	1.83469e-47	4.61414e-46
	ENSCAFG00000015925	1.20774	5.29118	5.2953e-81	3.47605e-79
	ENSCAFG00000004127	1.209	3.42167	4.19087e-14	2.38344e-13
	ENSCAFG00000003869	1.20965	0.100718	3.08047e-05	7.79613e-05
	ENSCAFG00000016428	1.21419	7.0605	1.36443e-47	3.43889e-46
	ENSCAFG00000016988	1.21468	4.97021	9.28017e-74	4.96895e-72
	ENSCAFG00000010571	1.21862	2.75547	1.19823e-18	9.11735e-18
	ENSCAFG00000019194	1.22098	2.64326	1.09909e-14	6.49561e-14
	ENSCAFG00000019417	1.22198	4.90553	2.41445e-56	8.13146e-55
	ENSCAFG00000011525	1.22247	2.18976	2.85049e-07	9.16938e-07
	ENSCAFG00000020110	1.22279	6.15821	1.69244e-41	3.60155e-40
	ENSCAFG00000019224	1.22604	7.0319	1.82971e-49	4.82071e-48
	ENSCAFG00000012022	1.22639	5.1824	3.80214e-60	1.43432e-58
	ENSCAFG00000015063	1.227	0.749143	4.46497e-07	1.40745e-06
	ENSCAFG00000028027	1.22803	3.36268	1.99623e-26	2.32406e-25
	ENSCAFG00000012683	1.22839	2.21993	2.35879e-12	1.19005e-11
	ENSCAFG00000005810	1.2285	3.4506	8.05741e-23	7.71161e-22
	ENSCAFG00000012576	1.23202	0.65753	3.53061e-05	8.84861e-05
	ENSCAFG00000000143	1.23363	2.17095	3.98e-13	2.1203e-12
	ENSCAFG00000008022	1.23668	1.30798	2.6842e-10	1.14661e-09
	ENSCAFG00000002653	1.23715	1.53764	1.1714e-09	4.72258e-09
	ENSCAFG00000029819	1.2404	1.79689	7.84738e-13	4.0924e-12
	ENSCAFG00000007112	1.24196	7.41881	9.42602e-136	1.85629e-133
	ENSCAFG00000019975	1.24648	3.74815	4.22197e-26	4.82351e-25
	ENSCAFG00000018020	1.24833	3.30952	5.98104e-30	8.17573e-29
	ENSCAFG00000008904	1.24917	2.06232	7.53463e-12	3.66603e-11
	ENSCAFG00000030308	1.24932	4.35695	8.43873e-33	1.29695e-31
	ENSCAFG00000018846	1.24951	4.06237	4.41942e-42	9.61596e-41
	ENSCAFG00000030245	1.25148	0.53455	0.00142862	0.00283747
	ENSCAFG00000009281	1.25229	3.13767	3.98368e-13	2.12128e-12
	ENSCAFG00000000804	1.25316	5.11073	3.26845e-67	1.49512e-65
	ENSCAFG00000009609	1.25954	1.92156	2.47235e-13	1.33922e-12
	ENSCAFG00000008483	1.26359	6.33328	9.6349e-119	1.39935e-116
	ENSCAFG00000009074	1.26612	2.54646	2.57388e-16	1.69959e-15
	ENSCAFG00000000402	1.26733	2.58635	8.93312e-16	5.70296e-15
	ENSCAFG00000004423	1.2742	2.85066	2.17016e-24	2.26347e-23
	ENSCAFG00000000755	1.28914	4.3128	1.09377e-42	2.43925e-41
	ENSCAFG00000009017	1.29104	2.47171	1.09572e-14	6.47899e-14
	ENSCAFG00000008061	1.2929	1.98765	1.47309e-10	6.44906e-10
	ENSCAFG00000013418	1.29746	5.35485	2.34072e-45	5.60759e-44
	ENSCAFG00000005689	1.30096	0.108598	2.67875e-05	6.82704e-05
	ENSCAFG00000001498	1.30627	3.50678	4.61272e-35	7.75619e-34
	ENSCAFG00000019196	1.30719	2.44068	4.95834e-18	3.62105e-17
	ENSCAFG00000001741	1.31133	0.871755	3.4241e-09	1.33059e-08
	ENSCAFG00000012473	1.3159	2.70018	5.61791e-19	4.35164e-18
	ENSCAFG00000019520	1.31635	2.28061	3.37236e-12	1.68676e-11
	ENSCAFG00000007045	1.31661	5.58849	7.35399e-58	2.58927e-56
	ENSCAFG00000015282	1.32105	7.15868	2.78732e-114	3.81011e-112
	ENSCAFG00000003067	1.32208	-0.265851	5.36943e-05	0.000131397
	ENSCAFG00000027890	1.32522	6.2677	1.60307e-09	6.3941e-09
	ENSCAFG00000001711	1.32637	7.69566	7.65869e-98	7.54121e-96
	ENSCAFG00000013005	1.32668	1.67984	1.5304e-14	8.96706e-14
	ENSCAFG00000019243	1.32984	7.24217	1.56921e-65	6.72792e-64
	ENSCAFG00000028707	1.33026	7.29417	3.84183e-147	8.26633e-145
	ENSCAFG00000036239	1.33046	0.452539	1.4514e-05	3.82054e-05
	ENSCAFG00000002477	1.33441	2.68291	3.33023e-20	2.75402e-19
	ENSCAFG00000016608	1.33879	4.83835	2.91973e-77	1.67942e-75
	ENSCAFG00000025131	1.33922	0.248503	2.77725e-06	8.00716e-06
	ENSCAFG00000032813	1.34073	4.61891	3.79492e-65	1.61513e-63
	ENSCAFG00000010427	1.34241	1.97037	3.39697e-10	1.43577e-09
	ENSCAFG00000009242	1.3429	3.21285	1.44763e-26	1.69899e-25
	ENSCAFG00000019003	1.34365	5.24287	9.04545e-97	8.68588e-95
	ENSCAFG00000010642	1.34437	7.59987	6.74323e-134	1.30583e-131
	ENSCAFG00000007742	1.34816	1.94192	4.43529e-15	2.69668e-14
	ENSCAFG00000011241	1.35111	2.94957	1.42253e-19	1.13675e-18
	ENSCAFG00000007578	1.35292	1.17098	1.39247e-06	4.15595e-06
	ENSCAFG00000016679	1.35365	3.72325	1.46452e-19	1.1671e-18
	ENSCAFG00000010923	1.35392	1.28336	2.79417e-08	9.91008e-08
	ENSCAFG00000029442	1.35485	7.66357	1.14946e-164	3.25745e-162
	ENSCAFG00000016179	1.35725	0.531356	7.33828e-06	2.00809e-05
	ENSCAFG00000009450	1.35874	2.35061	1.79062e-20	1.50762e-19
	ENSCAFG00000037724	1.35982	0.544897	1.37018e-07	4.54861e-07
	ENSCAFG00000004890	1.36534	0.815044	1.55737e-07	5.14357e-07
	ENSCAFG00000014993	1.3659	4.15554	1.07116e-52	3.19943e-51
	ENSCAFG00000006713	1.36754	5.15967	2.85795e-92	2.51565e-90
	ENSCAFG00000002336	1.37482	3.55763	6.95973e-29	9.04531e-28
	ENSCAFG00000016604	1.37808	4.43917	2.80956e-37	5.17343e-36
	ENSCAFG00000019592	1.3833	5.98886	6.89852e-129	1.23314e-126
	ENSCAFG00000012434	1.3845	3.60792	5.2922e-45	1.24726e-43
	ENSCAFG00000020090	1.38505	2.08775	1.41806e-19	1.13396e-18
	ENSCAFG00000012668	1.38527	6.05784	1.74834e-69	8.32539e-68
	ENSCAFG00000009903	1.39041	5.87012	1.01705e-74	5.49632e-73
	ENSCAFG00000019525	1.39342	1.20833	7.23058e-12	3.52104e-11
	ENSCAFG00000010371	1.39603	0.083029	2.32848e-06	6.76367e-06
	ENSCAFG00000002432	1.39781	3.5319	1.50676e-32	2.30659e-31
	ENSCAFG00000006699	1.40204	5.55209	2.64742e-125	4.33245e-123
	ENSCAFG00000004223	1.40245	1.64147	3.78344e-14	2.15807e-13
	ENSCAFG00000005428	1.40386	4.13747	2.34031e-48	5.97627e-47
	ENSCAFG00000020140	1.40431	5.0846	9.82706e-71	4.83816e-69
	ENSCAFG00000012038	1.40442	0.355244	3.80335e-05	9.49327e-05
	ENSCAFG00000000810	1.40869	5.72646	2.61127e-76	1.46572e-74
	ENSCAFG00000011742	1.40949	5.21016	4.92952e-98	4.93759e-96
	ENSCAFG00000001559	1.41175	1.05738	5.22165e-11	2.3783e-10
	ENSCAFG00000012464	1.41936	1.36164	4.88323e-12	2.4144e-11
	ENSCAFG00000010585	1.41977	1.60245	5.16989e-09	1.97012e-08
	ENSCAFG00000014675	1.42117	0.581938	8.12425e-08	2.74966e-07
	ENSCAFG00000001601	1.4242	7.10674	7.5393e-187	2.73747e-184
	ENSCAFG00000006421	1.42986	3.11672	1.23681e-33	1.96051e-32
	ENSCAFG00000003928	1.43069	0.9706	1.02286e-10	4.54826e-10
	ENSCAFG00000000200	1.4361	6.82289	1.04702e-45	2.54506e-44
	ENSCAFG00000014076	1.43875	7.0506	1.28784e-156	3.25292e-154
	ENSCAFG00000001371	1.44079	7.87014	2.83314e-254	1.73254e-251
	ENSCAFG00000030412	1.44161	5.39896	1.51855e-106	1.81898e-104
	ENSCAFG00000005251	1.44224	3.68639	1.71593e-41	3.64485e-40
	ENSCAFG00000019342	1.44292	8.31148	5.29213e-220	2.45957e-217
	ENSCAFG00000010140	1.44403	-0.0763874	1.20207e-05	3.19535e-05
	ENSCAFG00000015054	1.44706	2.63046	3.34126e-17	2.31912e-16
	ENSCAFG00000008683	1.45281	2.8123	1.93694e-32	2.94187e-31
	ENSCAFG00000032175	1.45303	3.52415	2.8965e-33	4.54176e-32
	ENSCAFG00000001793	1.45389	2.58994	5.42154e-23	5.22329e-22
	ENSCAFG00000007983	1.454	2.59344	3.73924e-22	3.47015e-21
	ENSCAFG00000007934	1.45823	10.6488	1.21955e-255	7.87222e-253
	ENSCAFG00000014388	1.45909	9.64946	6.98721e-223	3.6902e-220
	ENSCAFG00000024229	1.4645	0.705438	7.97841e-09	2.98266e-08
	ENSCAFG00000014620	1.47086	4.31263	8.74298e-61	3.36373e-59
	ENSCAFG00000028891	1.47304	3.08327	2.50459e-30	3.47681e-29
	ENSCAFG00000025390	1.47813	5.3475	2.79922e-113	3.73841e-111
	ENSCAFG00000019337	1.47867	2.35418	2.58597e-21	2.28143e-20
	ENSCAFG00000025153	1.4795	2.2456	1.42495e-19	1.13791e-18
	ENSCAFG00000000355	1.48352	8.85749	6.29598e-113	8.31284e-111
	ENSCAFG00000005575	1.48614	5.83683	3.80964e-128	6.7067e-126
	ENSCAFG00000032422	1.49358	3.22066	2.91695e-24	3.02068e-23
	ENSCAFG00000013474	1.49469	5.29108	3.56915e-94	3.26535e-92
	ENSCAFG00000003850	1.50323	4.51812	9.38409e-46	2.29062e-44
	ENSCAFG00000029288	1.50708	1.18657	5.00357e-10	2.08524e-09
	ENSCAFG00000008674	1.50742	0.100511	5.88153e-07	1.82818e-06
	ENSCAFG00000012081	1.51209	6.49053	4.70671e-67	2.1446e-65
	ENSCAFG00000009519	1.51304	0.0311626	1.32918e-05	3.51153e-05
	ENSCAFG00000010453	1.51568	2.268	3.03473e-23	2.96806e-22
	ENSCAFG00000029877	1.51597	3.74911	2.07312e-47	5.2025e-46
	ENSCAFG00000024466	1.51756	1.66466	2.11899e-17	1.48406e-16
	ENSCAFG00000028609	1.52436	1.07476	2.85048e-12	1.43004e-11
	ENSCAFG00000001549	1.52711	2.25784	7.71732e-25	8.22638e-24
	ENSCAFG00000016091	1.5303	3.46213	2.12394e-27	2.58409e-26
	ENSCAFG00000016331	1.53346	4.04891	9.24645e-51	2.52787e-49
	ENSCAFG00000010735	1.53639	0.323079	1.82735e-08	6.60199e-08
	ENSCAFG00000000945	1.54373	5.00053	1.58041e-73	8.34673e-72
	ENSCAFG00000002579	1.54441	3.58206	9.37827e-28	1.15675e-26
	ENSCAFG00000010602	1.54632	2.45056	2.61839e-13	1.41503e-12
	ENSCAFG00000003861	1.54895	11.6739	7.63217e-119	1.12251e-116
	ENSCAFG00000013251	1.5566	0.786701	1.86808e-10	8.102e-10
	ENSCAFG00000012306	1.55839	1.44618	1.91518e-08	6.9e-08
	ENSCAFG00000006145	1.5604	5.26771	9.93307e-70	4.7691e-68
	ENSCAFG00000013482	1.56387	4.93848	1.13646e-92	1.00798e-90
	ENSCAFG00000031860	1.56807	1.14667	3.36158e-11	1.55424e-10
	ENSCAFG00000013807	1.58062	3.69504	3.66834e-22	3.40707e-21
	ENSCAFG00000030731	1.58595	1.85654	5.66282e-21	4.89192e-20
	ENSCAFG00000019519	1.58873	0.685174	6.18282e-11	2.79417e-10
	ENSCAFG00000012290	1.59068	7.90664	6.00415e-173	1.88546e-170
	ENSCAFG00000008685	1.59307	4.09741	1.06258e-51	3.04092e-50
	ENSCAFG00000032529	1.59888	6.34578	5.40187e-148	1.20701e-145
	ENSCAFG00000012643	1.60478	6.97446	1.2367e-168	3.78138e-166
	ENSCAFG00000018207	1.61292	1.41397	5.26646e-12	2.59614e-11
	ENSCAFG00000037371	1.61502	1.37548	4.98418e-16	3.23707e-15
	ENSCAFG00000012621	1.61763	2.13074	5.44666e-19	4.22462e-18
	ENSCAFG00000036339	1.6184	0.040768	1.51367e-07	5.00493e-07
	ENSCAFG00000014322	1.61956	5.30213	8.23413e-52	2.37991e-50
	ENSCAFG00000010807	1.6227	3.7682	1.53818e-41	3.29744e-40
	ENSCAFG00000000952	1.63128	0.728831	6.82724e-10	2.81097e-09
	ENSCAFG00000031494	1.63572	2.77092	6.22667e-31	8.95392e-30
	ENSCAFG00000012984	1.64071	4.90335	1.93401e-104	2.22488e-102
	ENSCAFG00000002923	1.64323	1.20063	1.6738e-10	7.28113e-10
	ENSCAFG00000011570	1.64817	1.5103	6.15802e-13	3.23903e-12
	ENSCAFG00000007308	1.65662	3.06678	1.40949e-25	1.56716e-24
	ENSCAFG00000017296	1.65779	7.69648	8.21131e-156	1.98765e-153
	ENSCAFG00000004617	1.664	2.11925	2.22602e-22	2.08919e-21
	ENSCAFG00000000196	1.66685	4.96794	3.84371e-91	3.30815e-89
	ENSCAFG00000016903	1.66857	-0.0297578	5.20222e-08	1.79308e-07
	ENSCAFG00000009570	1.67873	0.635171	1.41347e-10	6.19974e-10
	ENSCAFG00000006266	1.68014	3.69268	7.88196e-49	2.03061e-47
	ENSCAFG00000012374	1.68105	0.452126	6.46929e-10	2.67307e-09
	ENSCAFG00000000398	1.6863	5.77846	1.51633e-173	4.89395e-171
	ENSCAFG00000012619	1.68979	7.39023	3.74601e-55	1.21239e-53
	ENSCAFG00000013907	1.69696	2.33373	2.76061e-31	4.02454e-30
	ENSCAFG00000013957	1.69897	2.38118	6.88986e-11	3.10525e-10
	ENSCAFG00000017095	1.70344	3.82728	5.86023e-53	1.77318e-51
	ENSCAFG00000001141	1.70658	7.75372	2.1264e-132	4.05027e-130
	ENSCAFG00000005384	1.72218	0.617475	1.61365e-11	7.66515e-11
	ENSCAFG00000016798	1.72453	0.991305	8.05025e-13	4.19067e-12
	ENSCAFG00000005494	1.74338	2.72962	1.11026e-24	1.17273e-23
	ENSCAFG00000014104	1.74831	0.391827	7.28594e-11	3.27994e-10
	ENSCAFG00000028621	1.75399	6.15682	1.66783e-53	5.1402e-52
	ENSCAFG00000002753	1.75718	6.99753	1.58038e-286	1.22416e-283
	ENSCAFG00000009104	1.7603	5.57805	5.67039e-56	1.88241e-54
	ENSCAFG00000023317	1.76863	2.52493	1.47826e-31	2.17141e-30
	ENSCAFG00000012728	1.77407	0.990947	1.11838e-13	6.18195e-13
	ENSCAFG00000005395	1.78694	3.72752	8.80918e-80	5.56271e-78
	ENSCAFG00000016977	1.78974	1.31584	1.69407e-19	1.3445e-18
	ENSCAFG00000015756	1.79445	4.11107	6.10247e-10	2.52689e-09
	ENSCAFG00000008853	1.82464	2.75527	2.37771e-30	3.30462e-29
	ENSCAFG00000017130	1.83687	8.24252	5.99332e-107	7.25379e-105
	ENSCAFG00000030417	1.83938	2.71317	1.75889e-31	2.57387e-30
	ENSCAFG00000018623	1.84621	3.03413	3.06183e-53	9.31294e-52
	ENSCAFG00000009773	1.84964	2.50221	6.95544e-26	7.86907e-25
	ENSCAFG00000016086	1.85387	8.05474	0	0
	ENSCAFG00000006546	1.86283	4.9764	6.00305e-92	5.24432e-90
	ENSCAFG00000001254	1.8631	4.82293	4.24429e-110	5.41917e-108
	ENSCAFG00000011625	1.86313	2.05918	9.22522e-25	9.78884e-24
	ENSCAFG00000003895	1.87221	1.91687	1.64793e-30	2.29859e-29
	ENSCAFG00000020362	1.89231	0.438582	2.60536e-12	1.31046e-11
	ENSCAFG00000017626	1.89309	1.29313	2.87234e-17	1.99723e-16
	ENSCAFG00000029189	1.90065	3.50155	6.96191e-21	5.98302e-20
	ENSCAFG00000013740	1.91115	6.59554	2.1525e-143	4.54726e-141
	ENSCAFG00000008143	1.92787	1.58718	2.14828e-24	2.24266e-23
	ENSCAFG00000001533	1.93183	0.438831	9.65772e-13	5.00281e-12
	ENSCAFG00000031645	1.93222	0.945375	6.6911e-15	4.01777e-14
	ENSCAFG00000035196	1.93496	2.53167	2.44108e-43	5.51806e-42
	ENSCAFG00000005179	1.96409	6.01151	6.86156e-117	9.60536e-115
	ENSCAFG00000008404	1.96516	12.3292	0	0
	ENSCAFG00000015862	1.97784	4.19789	3.31665e-74	1.78408e-72
	ENSCAFG00000000360	1.98443	10.1797	0	0
	ENSCAFG00000019985	1.98542	0.343858	7.89905e-13	4.1175e-12
	ENSCAFG00000007140	1.99469	1.52721	2.7752e-17	1.932e-16
	ENSCAFG00000014701	2.01641	3.49781	3.86556e-66	1.70128e-64
	ENSCAFG00000006859	2.01675	0.953058	2.74523e-14	1.58533e-13
	ENSCAFG00000033447	2.01814	6.82338	6.03385e-214	2.59656e-211
	ENSCAFG00000014146	2.02133	0.348692	4.63094e-10	1.9362e-09
	ENSCAFG00000031339	2.03928	3.95027	2.15345e-64	8.90423e-63
	ENSCAFG00000001890	2.05975	1.7678	1.24823e-23	1.24598e-22
	ENSCAFG00000018385	2.06483	1.04113	2.78056e-20	2.31926e-19
	ENSCAFG00000003939	2.08104	4.08808	2.03482e-82	1.37457e-80
	ENSCAFG00000019937	2.09123	2.83281	3.31244e-58	1.18059e-56
	ENSCAFG00000000365	2.09802	8.50213	1.17376e-304	9.74138e-302
	ENSCAFG00000004443	2.10814	1.69492	3.33947e-19	2.61641e-18
	ENSCAFG00000017652	2.1264	0.344419	3.26833e-12	1.63614e-11
	ENSCAFG00000005843	2.13039	4.99729	9.26626e-152	2.15329e-149
	ENSCAFG00000012769	2.13103	1.24709	1.02456e-12	5.29083e-12
	ENSCAFG00000000450	2.13348	2.53991	3.76382e-36	6.60602e-35
	ENSCAFG00000014873	2.13528	3.1102	2.68502e-51	7.55381e-50
	ENSCAFG00000018349	2.13613	0.725498	1.12356e-11	5.39224e-11
	ENSCAFG00000017319	2.13696	2.67542	5.78258e-54	1.82575e-52
	ENSCAFG00000018008	2.13934	2.5367	5.79e-28	7.29653e-27
	ENSCAFG00000009317	2.15447	2.61748	3.81652e-32	5.72921e-31
	ENSCAFG00000009534	2.16225	0.0833391	1.87067e-12	9.51633e-12
	ENSCAFG00000020252	2.16549	11.0276	1.32805e-160	3.50696e-158
	ENSCAFG00000004592	2.20172	1.75806	7.70394e-32	1.14319e-30
	ENSCAFG00000014028	2.22017	0.212262	1.81138e-13	9.89023e-13
	ENSCAFG00000005609	2.22049	2.88248	6.4989e-38	1.23788e-36
	ENSCAFG00000007923	2.22112	2.37502	1.23135e-31	1.81562e-30
	ENSCAFG00000016093	2.22348	1.8512	3.54757e-34	5.78922e-33
	ENSCAFG00000014603	2.25497	0.241879	1.16169e-14	6.85511e-14
	ENSCAFG00000003293	2.26504	-0.0473509	8.6746e-11	3.87357e-10
	ENSCAFG00000004944	2.28395	1.10301	3.40484e-19	2.66403e-18
	ENSCAFG00000015703	2.28592	4.04221	8.23032e-86	6.05241e-84
	ENSCAFG00000031912	2.31575	0.228437	6.96073e-09	2.62331e-08
	ENSCAFG00000010828	2.32369	0.575382	2.12407e-17	1.48672e-16
	ENSCAFG00000014435	2.32521	0.677952	1.41722e-16	9.50184e-16
	ENSCAFG00000033956	2.32875	-0.286686	1.49729e-09	5.98863e-09
	ENSCAFG00000030640	2.37845	0.812965	8.71554e-21	7.44602e-20
	ENSCAFG00000001942	2.38264	1.1486	3.19952e-23	3.12397e-22
	ENSCAFG00000009418	2.38688	0.545757	2.96624e-18	2.20082e-17
	ENSCAFG00000007465	2.41906	4.12998	8.18971e-85	5.8378e-83
	ENSCAFG00000011850	2.42001	2.60109	1.0381e-47	2.62209e-46
	ENSCAFG00000031675	2.45947	3.35698	3.41791e-87	2.61268e-85
	ENSCAFG00000001873	2.48272	1.98729	1.52824e-41	3.28218e-40
	ENSCAFG00000038899	2.51369	-0.276523	2.82814e-12	1.41945e-11
	ENSCAFG00000010754	2.55462	-0.104415	6.90188e-13	3.61555e-12
	ENSCAFG00000014148	2.6177	2.24455	2.82204e-49	7.40165e-48
	ENSCAFG00000017814	2.63801	-0.244892	4.23737e-13	2.25224e-12
	ENSCAFG00000011913	2.63976	0.0244739	9.19616e-14	5.12717e-13
	ENSCAFG00000006977	2.70492	3.41083	5.5379e-84	3.92347e-82
	ENSCAFG00000011595	2.75157	0.689086	2.20409e-22	2.07027e-21
	ENSCAFG00000011002	2.7634	6.35965	3.65449e-259	2.49774e-256
	ENSCAFG00000011236	2.77373	2.05747	6.12714e-33	9.49217e-32
	ENSCAFG00000018047	2.82452	1.30836	4.1584e-34	6.7481e-33
	ENSCAFG00000031014	2.8504	1.03382	2.08996e-19	1.65417e-18
	ENSCAFG00000012396	2.91424	0.321311	8.92407e-20	7.23073e-19
	ENSCAFG00000010888	2.92212	7.50607	5.62004e-72	2.82681e-70
	ENSCAFG00000030120	2.96102	4.10528	6.09781e-157	1.57445e-154
	ENSCAFG00000029558	3.02599	2.85253	3.81456e-88	2.99469e-86
	ENSCAFG00000029721	3.14687	-0.00223858	1.16903e-18	8.90101e-18
	ENSCAFG00000001007	3.16885	3.72718	3.37698e-121	5.15069e-119
	ENSCAFG00000009421	3.19433	5.0842	2.68049e-100	2.75616e-98
	ENSCAFG00000018218	3.30006	-0.399825	2.02048e-15	1.25272e-14
	ENSCAFG00000017937	3.38957	4.75671	1.26668e-77	7.32216e-76
	ENSCAFG00000018146	3.5421	5.17201	2.27053e-139	4.62829e-137
	ENSCAFG00000009333	3.64993	2.64383	2.77478e-79	1.7149e-77
	ENSCAFG00000001106	4.09521	-0.164187	8.95484e-21	7.64484e-20
	ENSCAFG00000001091	4.11494	1.24225	8.9406e-51	2.46163e-49
	ENSCAFG00000006413	4.30805	0.34336	9.3727e-32	1.38551e-30
	ENSCAFG00000013306	4.59358	-0.152786	6.62125e-25	7.08401e-24
	ENSCAFG00000014752	4.63515	0.109025	1.61093e-26	1.88494e-25
	ENSCAFG00000007018	5.26902	0.686893	1.63214e-38	3.17652e-37
	ENSCAFG00000009258	5.53799	0.051756	4.71916e-22	4.33797e-21
